# Supplementary material
Source: Research Square preprint supplement (doi:10.21203/rs.3.rs-9597622/v1)
Supplement: Supplementary file 1 [file a14210350de9fc26d60c5cd1.docx]

**Interview Guide**

This semi‑structured interview guide was developed by the research team and used to explore the lived experiences, challenges, needs, and coping strategies of family caregivers providing home care for patients with advanced COPD.

The interviewer used open-ended questions and probing where needed to encourage detailed reflection.

**Main Interview Questions**

1. **Can you describe your overall experience of caring for your family member with advanced COPD at home?**
2. **What kinds of daily care or responsibilities do you usually perform for them?**
3. **What challenges or difficulties have you faced while providing care at home?**
4. **How has caregiving affected your daily life, work, or personal routines?**
5. **How has this responsibility influenced you emotionally and psychologically?**
6. **What kinds of support have you received from healthcare providers, family members, or others?**
7. **What types of support do you feel you need the most in order to continue caring effectively?**
8. **How do you cope with stressful or difficult moments during caregiving?**
9. **Is there anything else about your caregiving experience that you would like to share?**

**Probing Questions (used when needed)**

• Could you explain a little more about that?

• How did you feel in that situation?

• What happened next?

• Can you give an example?

• What do you mean when you say…?
